# Supplementary material
Source: PubMed Central journal article supplement (PMC6785797)

**Supplemental Table 1 Demography.** Demographic data for Alzheimer’s disease (AD), mild cognitive impairment (MCI), AD/MCI matched control, multiple sclerosis (MS), and MS control groups.

|                   | AD       | MCI      | AD/MCI controls | MS       | MS controls |
|-------------------|----------|----------|-----------------|----------|-------------|
| Total number      | 11       | 12       | 12              | 20       | 8           |
| Age (mean±SD)     | 66.5±4.1 | 68.6±7.9 | 64.4±6.6        | 32.3±5.6 | 31.6±6.4    |
| Age range         | 58-75    | 55-78    | 54-75           | 20-43    | 26-43       |
| Sex (female/male) | 6/5      | 4/8      | 5/7             | 13/7     | 5/3         |
| MMSE (mean±SD)    | 22.2±3.8 | -        | 29.9±0.4        | -        | -           |
| MMSE range        | 16-26    | -        | 29-30           | -        | -           |
| Amyloid positive  | -        | 6        | -               | -        | -           |
| EDSS (mean±SD)    | -        | -        | -               | 2.2±1.4  | -           |
| EDSS range        | -        | -        | -               | 0-6      | -           |
| MSSS (mean±SD)    | -        | -        | -               | 3.4±2.0  | -           |
| MSSS range        | -        | -        | -               | 0.5-6.9  | -           |

**Supplemental Figure 1 Lateral ventricle region of interest (ROI).** Lateral ventricle cerebrospinal fluid (CSF) is filled with red. ROI was generated using ITK-SNAP snake tool and has subsequently been eroded by 2 voxels.

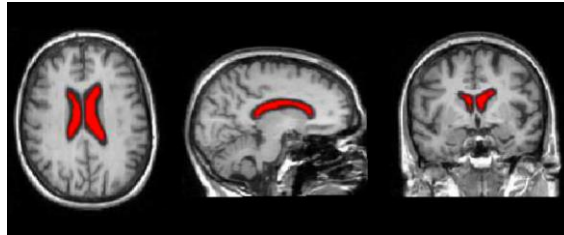

*Testing of compartmental models*

**Supplemental Figure 2 Example data fits from compartmental modelling.** A: Alzheimer's patient lateral ventricle TAC data fit example. B: Healthy control lateral ventricle TAC data fit example. The waited residuals are shown in the upper right corner of each image.

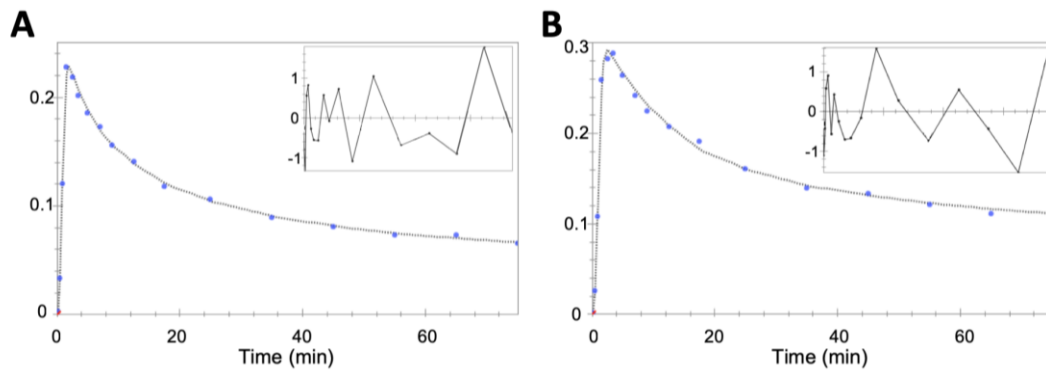

**Supplemental Figure 3 Compartmental model using only cerebellar gray matter as  $K_{1\text{tissue}}$  input to lateral ventricles to confirm rate constant differences is not due to amyloid-beta accumulation in tissue.  $K_{\text{clearance}}$  includes total clearance from lateral ventricles to blood, tissue, and rest of ventricular system.**

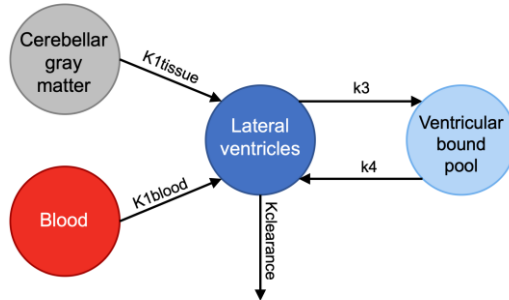

**Supplemental Figure 4 Simplified model excluding gray matter tissue input to lateral ventricles.  $K_{\text{clearance}}$  includes total clearance from lateral ventricles to blood, tissue, and rest of ventricular system.**

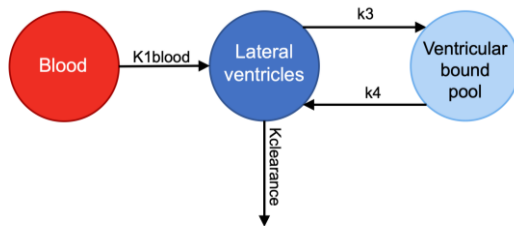

**Supplemental Figure 5 Simplified model excluding ventricular bound pool.  $K_{\text{clearance}}$  includes total clearance from lateral ventricles to blood, tissue, and rest of ventricular system.**

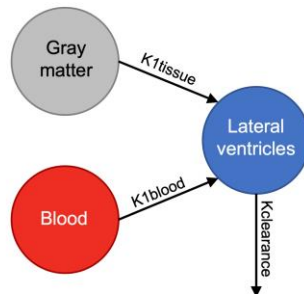

Supplement: jnm223834SupplementalData.pdf [file jnm223834SupplementalData.pdf]
